# Supplementary material for: Evaluating Alternative Correction Methods for Multiple Comparison in Functional Neuroimaging Research
Source: MDPI journal article supplement (doi:10.3390/brainsci9080198), 2019-08-12
Supplement: s1 [file s1]

## Supplementary Materials

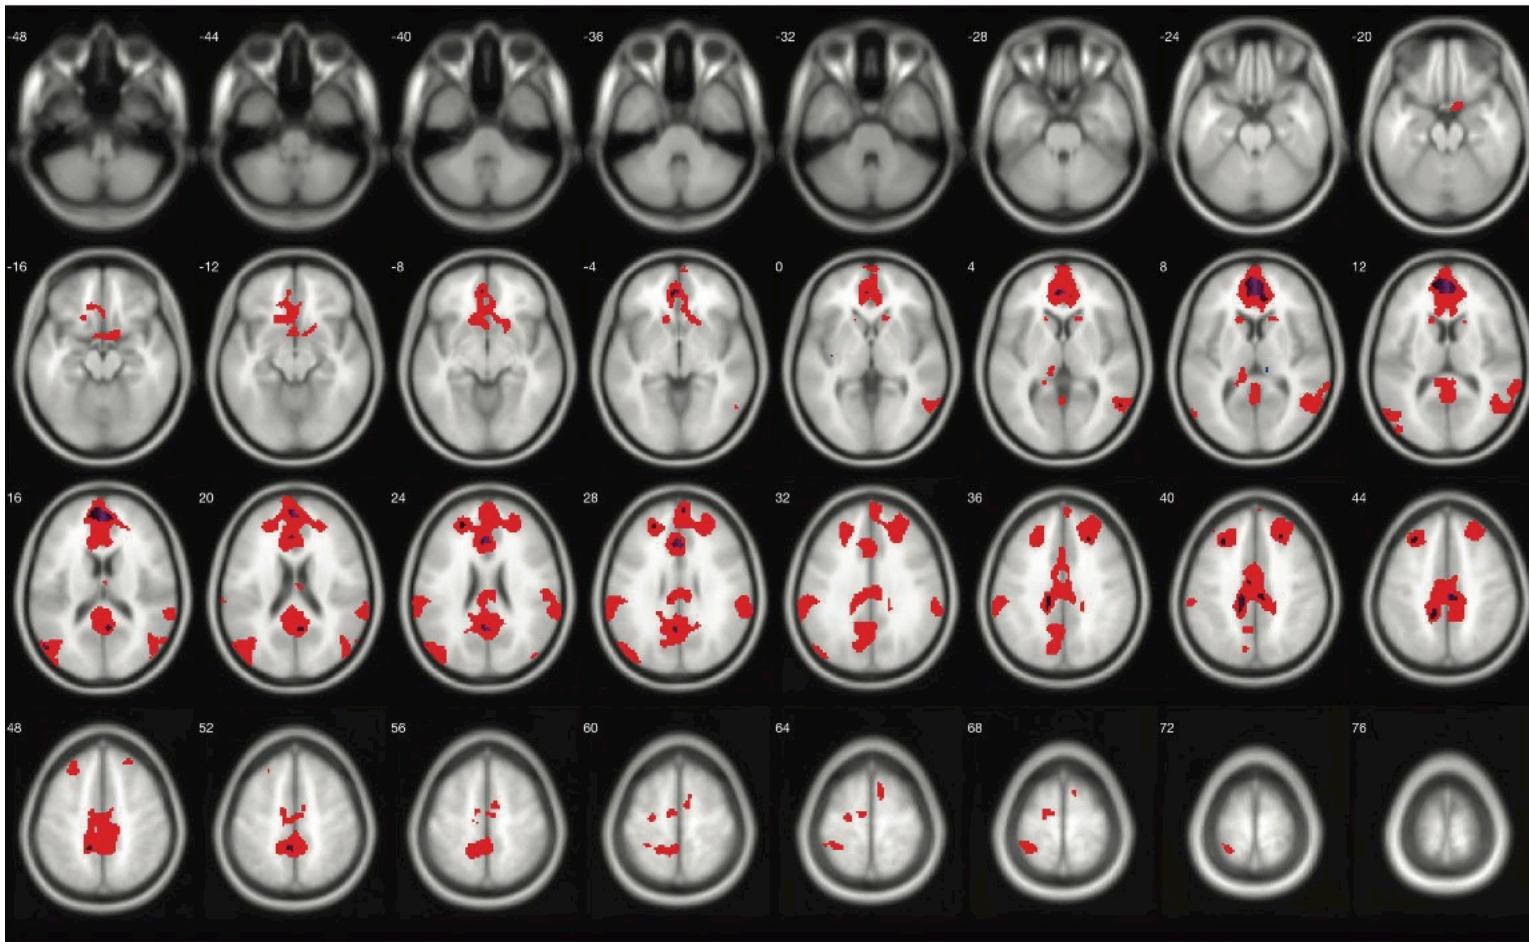

*Figure S1.* Voxels survived SnPM thresholding with moral psychology fMRI data (Red to purple: SnPM clusterwise, Blue to purple: SnPM voxelwise)

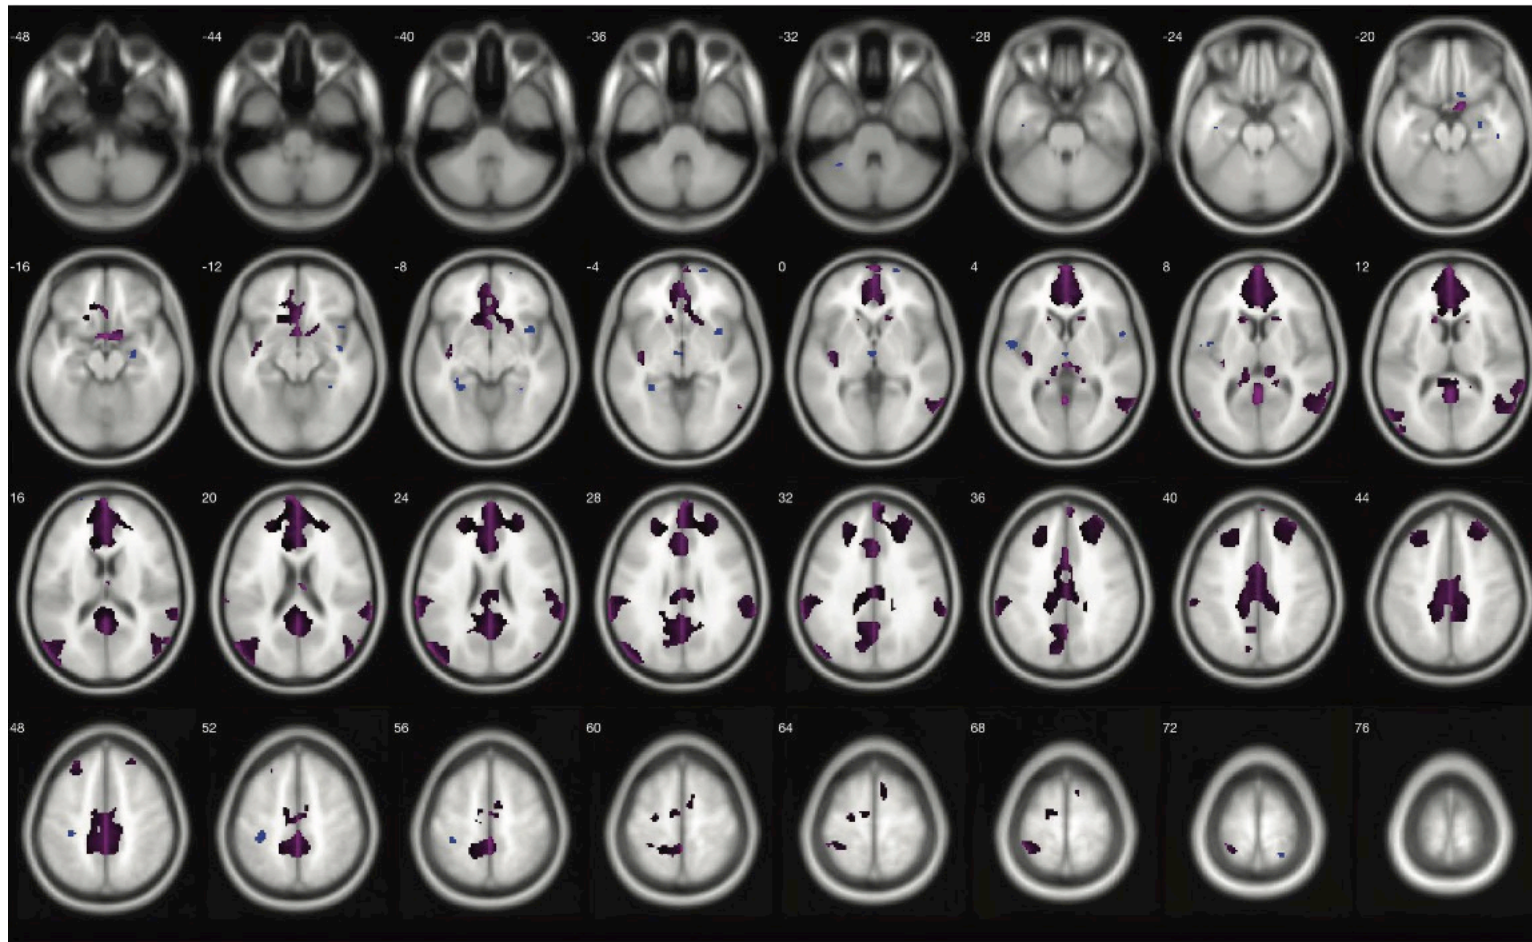

*Figure S2.* Voxels survived 3DClustSim thresholding with moral psychology fMRI data (Red to purple: with acf, Blue to purple: without acf)



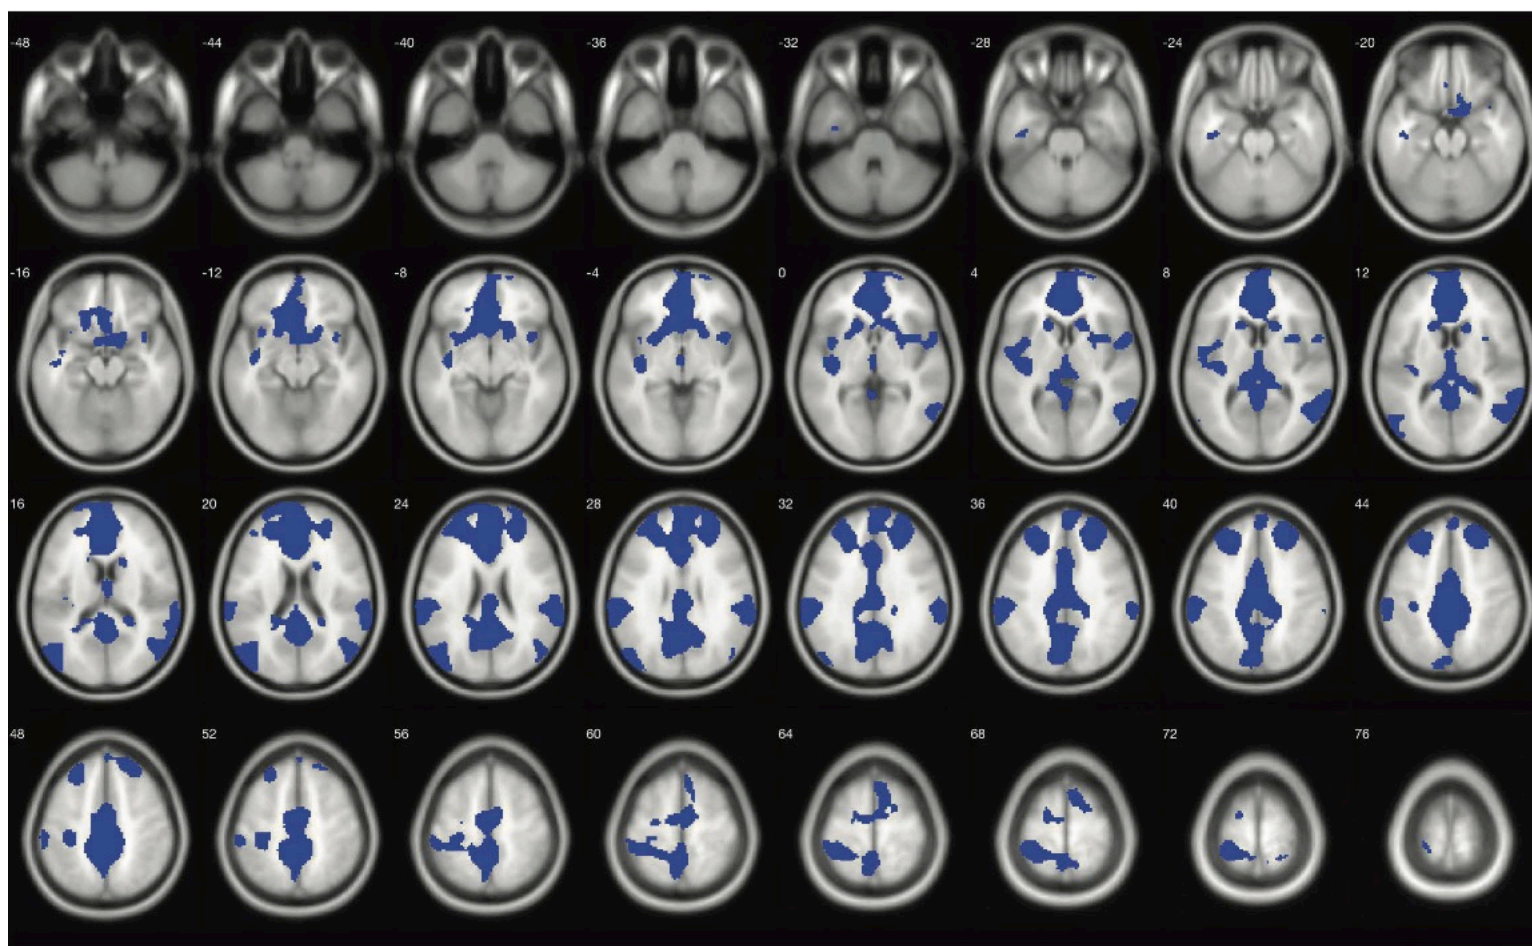

*Figure S3.* Voxels survived TFCE thresholding with moral psychology fMRI data

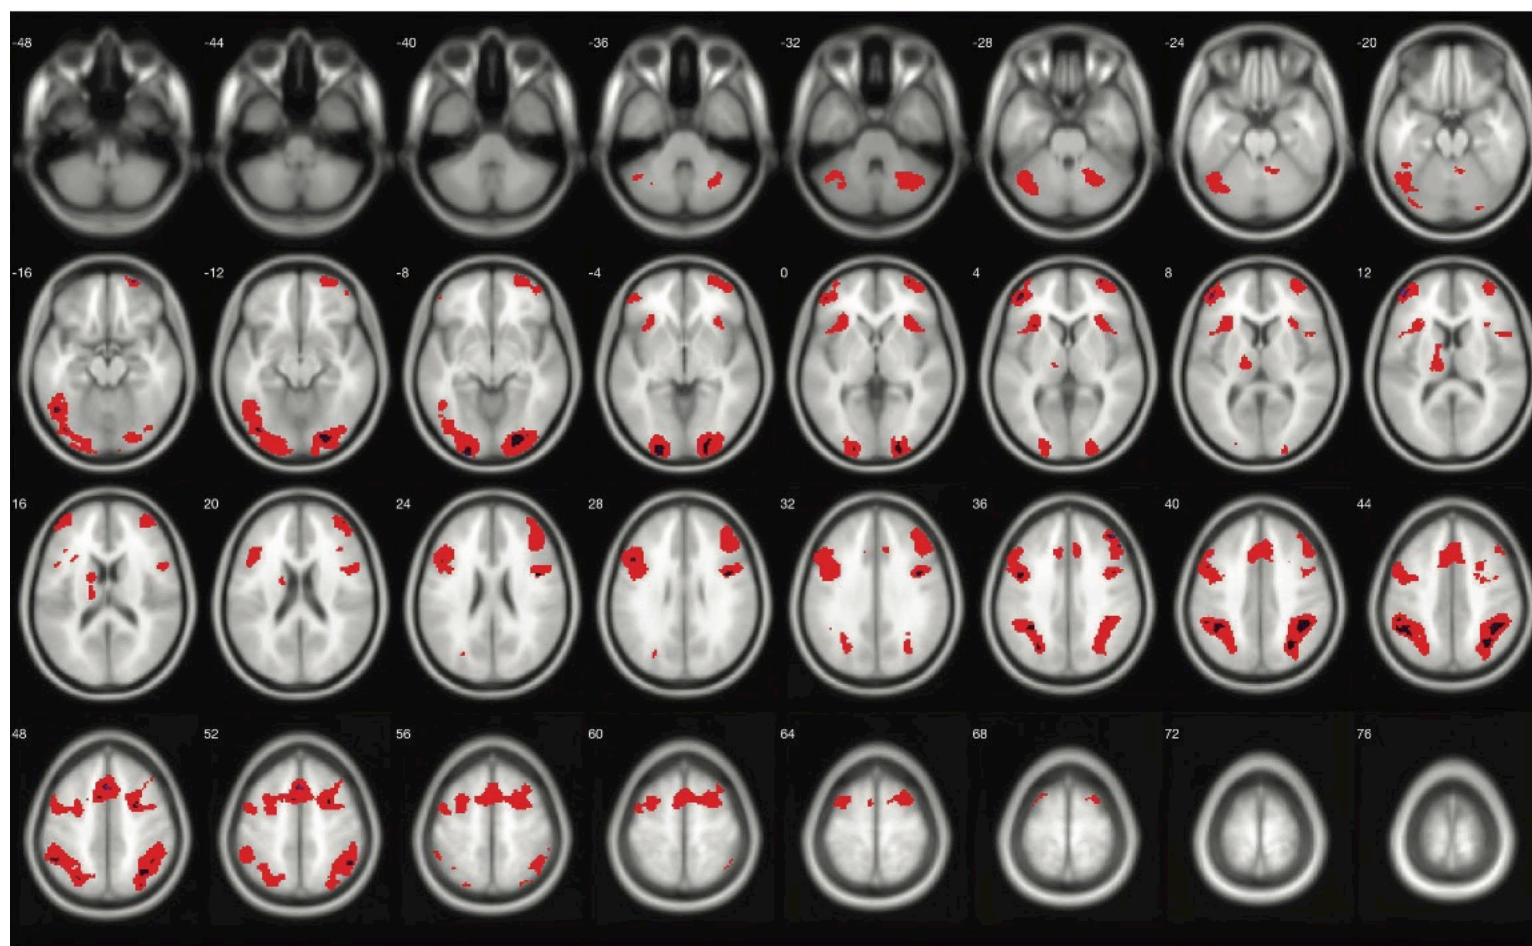

*Figure S4.* Voxels survived SnPM thresholding with working memory fMRI data (Red to purple: SnPM clusterwise, Blue to purple: SnPM voxelwise)



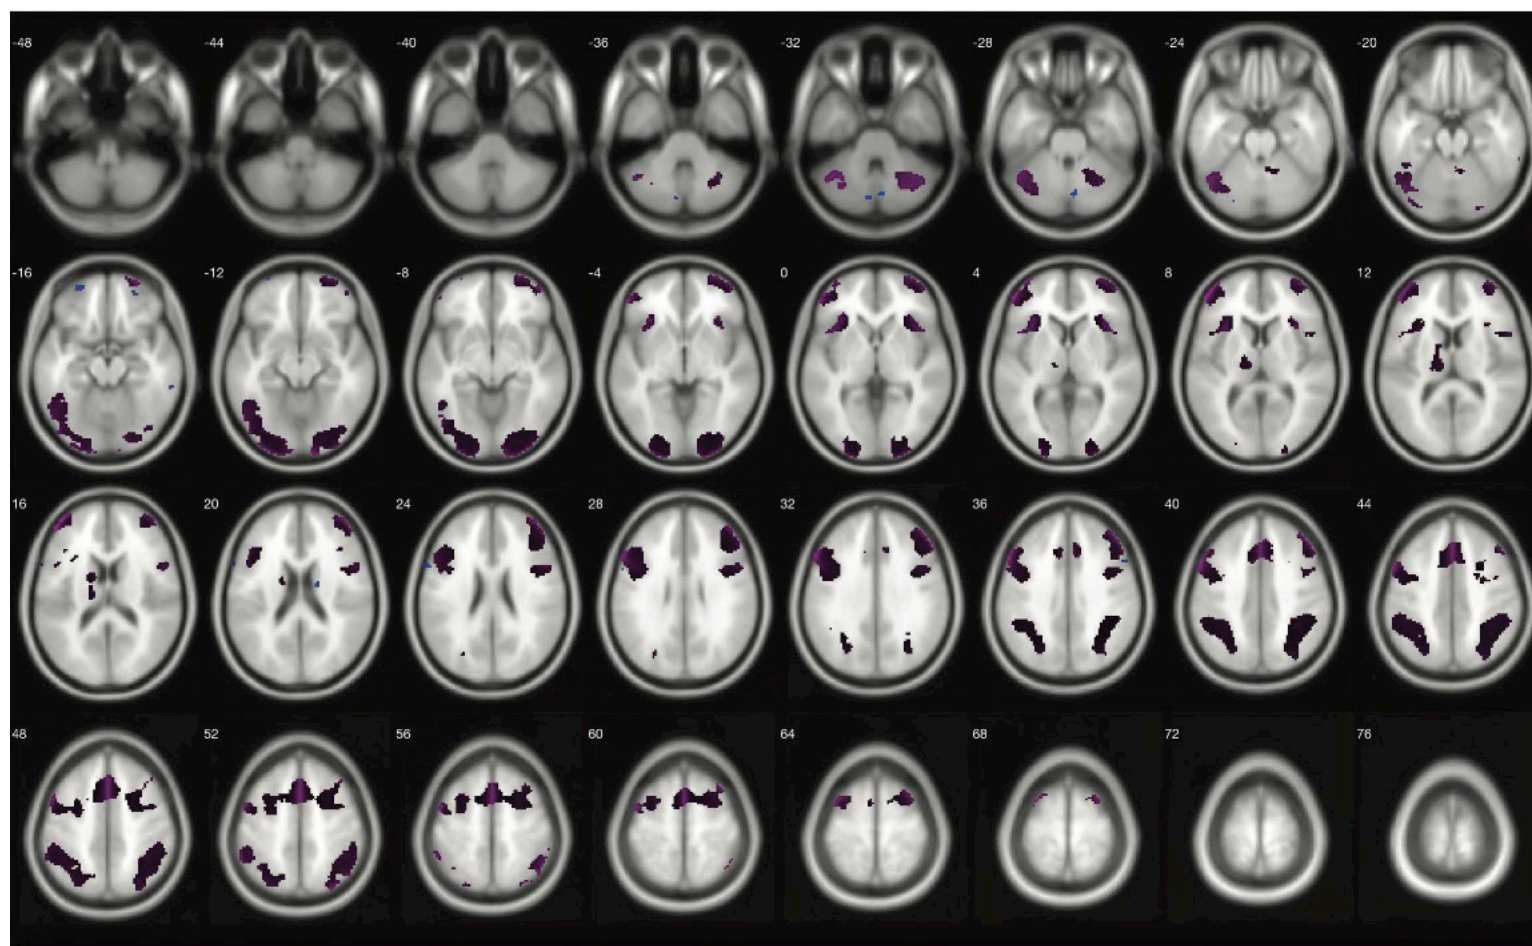

*Figure S5.* Voxels survived 3DClustSim thresholding with working memory fMRI data (Red to purple: with acf, Blue to purple: without acf)

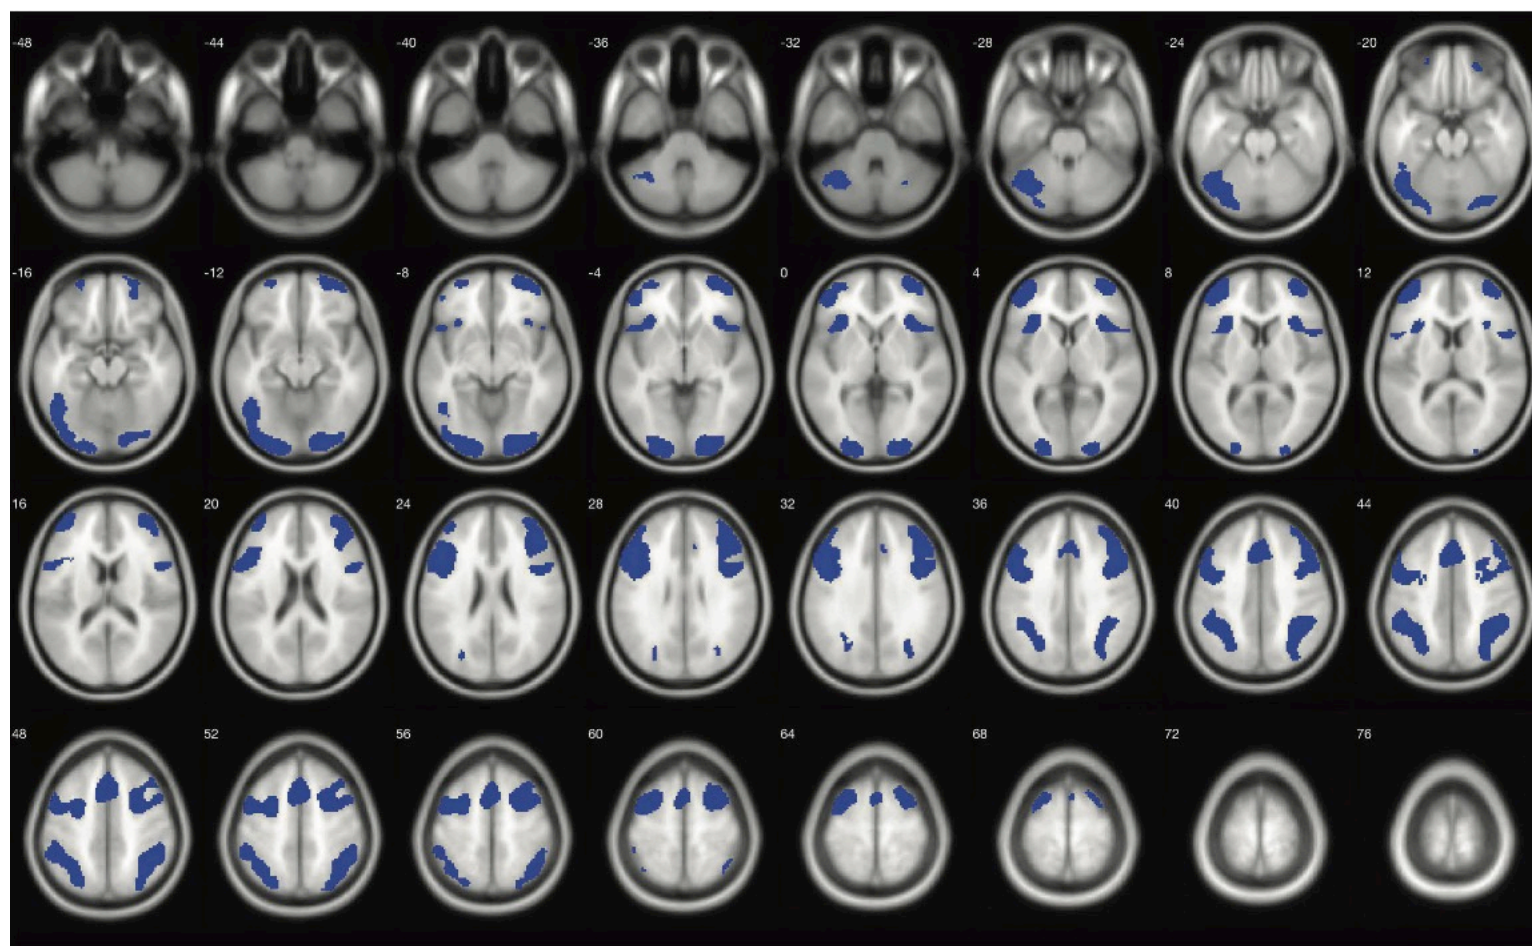

*Figure S6.* Voxels survived TFCE thresholding with working memory fMRI data
